# Supplementary material
Source: Research Square preprint supplement (doi:10.21203/rs.3.rs-9246435/v1)
Supplement: Supplementary file 1 [file 0550681c44a24d6bd7e51210.docx]

**Table 1:** Baseline characteristics

|  | **All**  **(n=382)** | **<65 years**  **(n=229)** | **P-value** | **≥65 years**  **(n=153)** |
| --- | --- | --- | --- | --- |
| Age in years |  |  | **<0.001** |  |
| Median (IQR) | 63 (56-67) | 58 (53-62) |  | 68 (66-70) |
| Range | 32-75 | 32-64 |  | 65-75 |
| ≥65 | 153 (40%) | NA |  | 153 (100%) |
| ≥70 | 39 (10%) | NA |  | 39 (25%) |
| Sex |  |  | >0.05 |  |
| Male | 229 (60%) | 137 (60%) |  | 92 (60%) |
| Female | 153 (40%) | 92 (40%) |  | 61 (40%) |
| ECOG performance status |  |  | >0.05 |  |
| 0 | 202 (53%) | 125 (55%) |  | 77 (50%) |
| 1 | 124 (32%) | 69 (30%) |  | 55 (36%) |
| 2 | 37 (10%) | 23 (10%) |  | 14 (9%) |
| 3 | 16 (4%) | 11 (5%) |  | 5 (3%) |
| Missing | 3 (1%) | 1 (0.4%) |  | 2 (1%) |
| Immunoglobulin isotype |  |  | >0.05 |  |
| IgG | 192 (50%) | 115 (50%) |  | 77 (50%) |
| IgA | 76 (20%) | 48 (21%) |  | 28 (18%) |
| IgM | 2 (1%) | 1 (0.4%) |  | 1 (1%) |
| Light-chain only | 112 (29%) | 65 (28%) |  | 47 (31%) |
| Myeloma defining eventa |  |  |  |  |
| Hypercalcemia | 42 (11%) | 24 (10%) | >0.05 | 18 (12%) |
| Renal insufficiency | 71 (19%) | 44 (19%) | >0.05 | 27 (18%) |
| Anemia | 197 (52%) | 110 (48%) | >0.05 | 87 (57%) |
| Osteolytic lesion (s) | 302 (79%) | 177 (77%) | >0.05 | 125 (82%) |
| BM plasma cells≥60% | 182 (48%) | 105 (46%) | >0.05 | 77 (50%) |
| S-FLCr >100 mg/L | 138 (36%) | 82 (37%) | >0.05 | 56 (37%) |
| Plasmacytoma(s)b |  |  | >0.05 |  |
| Yes | 42 (11%) | 23 (10%) |  | 19 (12%) |
| No | 340 (89%) | 206 (90%) |  | 136 (89%) |
| ISS stage |  |  | **<0.001** |  |
| I | 133 (35%) | 95 (41%) |  | 38 (25%) |
| II | 145 (40%) | 70 (31%) |  | 75 (49%) |
| III | 101 (26%) | 61 (27%) |  | 40 (26%) |
| Missing | 3 (1%) | 3 (1%) |  | 0 (0%) |
| R-ISS stage |  |  | >0.05 |  |
| I | 84 (22%) | 57 (25%) |  | 27 (18%) |
| II | 213 (56%) | 119 (52%) |  | 94 (61%) |
| III | 71 (19%) | 42 (18%) |  | 29 (19%) |
| Missing | 14 (4%) | 11 (5%) |  | 3 (2%) |
| Cytogenetic risk |  |  |  |  |
| del(17p) | 40 (10%) | 28 (12%) |  | 12 (8%) |
| t(4;14) | 35 (9%) | 23 (10%) |  | 12 (8%) |
| t(14;16) | 13 (3%) | 8 (3%) |  | 5 (3%) |
| 1q+ | 128 (34%) | 76 (33%) |  | 52 (34%) |
| t(14;20) | 6 (2%) | 3 (1%) |  | 3 (2%) |
| t(11;14) | 70 (18%) | 41(18%) |  | 29 (19%) |
| Missing | 3 (1%) | 0 (0%) |  | 3 (2%) |
| High riskc | 79 (21%) | 52 (23%) | >0.05 | 27 (18%) |
| Double hitd | 45 (12%) | 30 (13%) | >0.05 | 15 (10%) |
| Therapy before inclusione |  |  | >0.05 |  |
| Yes | 99 (26%) | 60 (26%) |  | 39 (25%) |
| No | 283 (74%) | 169 (74%) |  | 114 (75%) |
| Comorbidities |  |  |  |  |
| Prior malignancyf | 42 (11%) | 14 (6%) | **<0.001** | 28 (18%) |
| Systemic AL amyloidosis | 4 (1%) | 3 (1%) | >0.5 | 1 (0.7%) |
| Plasma cell leukemia | 2 (0.3%) | 1 (0.4%) | >0.5 | 1 (0.7%) |

Data are n (%), unless stated otherwise. P-values compare patients <65 years vs ≥65 years: Chi-square/Fisher’s exact test (categorical), Mann–Whitney U test (continuous). Bold p-values indicates statistical significance.

IQR=interquartile range. eGFR=estimated glomerular filtration rate in ml/min per 1.73m2. ECOG=Eastern Cooperative Oncology Group. BM=bone marrow. S-FLCr=serum free light chain ratio. ISS=International Staging System. R-ISS=Revised-ISS.

aRenal insufficiency: Creatinine >177 μmol/L or eGFR <40 mL/min per 1.73 m2. Hemoglobin <10 g/dL or >2 g/dL below lower limit of normal. Osteolytic lesions: one or more osteolytic lesion detected by CT or PET-CT. Hypercalcemia: Hypercalcemia: serum calcium >0.25 mmol/L (>1 mg/dL) higher than the upper limit of normal or >2.75 mmol/L ( >11 mg/dL). bBoth paramedullar and extramedullar plasmacytomas included. cDefined as one or more of del(17p), t(4;14), and t(14;16). d t(4;14) or t(14;16) or t(14;20) and 1q+ or del17p. eOne cycle of bortezomib and dexamethasone with or without lenalidomide was allowed according to the protocol. fNot including basal cell carcinoma of the skin.
