# Supplementary material
Source: Research Square preprint supplement (doi:10.21203/rs.3.rs-9246435/v1)
Supplement: Supplementary file 2 [file 0b6fc1d962c9a79728e2de3f.docx]

**Table 3:** Adverse events from cycle 1 day 1 to the post-consolidation visit

|  |  | **All**  **(n=382)** | **<65**  **(n=229)** | **P-value** | **≥65**  **(n=153)** |
| --- | --- | --- | --- | --- | --- |
| Infections | | | | | |
|  | Any grade ≥2 | 262 (69%) | 156 (68%) | >0.05 | 106 (69%) |
|  | Grade 2 | 179 (47%) | 108 (47%) |  | 71 (46%) |
|  | Grade 3 | 161 (42%) | 95 (41%) |  | 66 (43%) |
|  | Grade 4 | 8 (2%) | 5 (2%) |  | 3 (2%) |
|  | Grade 5* | 5 (1%) | 2 (1%) |  | 3 (2%) |
| Blood and lymphatic system disorder | | | | | |
|  | Any grade ≥2 | 100 (26%) | 59 (26%) | >0.05 | 41 (27%) |
|  | Grade 2 | 44 (12%) | 21 (9%) |  | 23 (15%) |
|  | Grade 3 | 71 (19%) | 46 (20%) |  | 25 (16%) |
|  | Grade 4 | 12 (3%) | 7 (3%) |  | 5 (3%) |
| Vascular disorder | | | | | |
| Thromboembolic event | Any grade ≥2 | 33 (9%) | 13 (6%) | **<0.05** | 20 (13%) |
|  | Grade 2 | 19 (5%) | 7 (3%) |  | 12 (8%) |
|  | Grade 3 | 13 (3%) | 6 (3%) |  | 7 (5%) |
|  | Grade 4 | 1 (0.3%) | 0 (0%) |  | 1 (1%) |
| Other | Any grade ≥2 | 22 (6%) | 12 (5%) | >0.5 | 10 (7%) |
|  | Grade 2 | 16 (4%) | 8 (3%) |  | 8 (5%) |
|  | Grade 3 | 6 (2%) | 4 (2%) |  | 2 (1%) |
|  | Grade 4 | 0 (0%) | 0 (0%) |  | 0 (0%) |
| Musculoskeletal and connective tissue disorders | | | | | |
|  | Any grade ≥2 | 76 (20%) | 38 (17%) | **<0.05** | 38 (25%) |
|  | Grade 2 | 42 (11%) | 20 (9%) |  | 22 (14%) |
|  | Grade 3 | 35 (9%) | 19 (8%) |  | 16 (10%) |
|  | Grade 4 | 0 (0%) | 0 (0%) |  | 0 (0%) |
| Metabolism and nutrition disorders | | | | | |
|  | Any grade ≥2 | 61 (16%) | 43 (19%) | >0.05 | 18 (12%) |
|  | Grade 2 | 34 (9%) | 23 (10%) |  | 11 (7%) |
|  | Grade 3 | 32 (8%) | 23 (10%) |  | 9 (6%) |
|  | Grade 4 | 4 (1%) | 2 (1%) |  | 2 (1%) |
| Gastrointestinal and hepatobiliary disorders | | | | | |
|  | Any grade ≥2 | 93 (24%) | 47 (21%) | **<0.05** | 46 (30%) |
|  | Grade 2 | 69 (18%) | 36 (16%) |  | 32 (21%) |
|  | Grade 3 | 30 (8%) | 15 (7%) |  | 15 (10%) |
|  | Grade 4 | 1 (0.3%) | 0 (0%) |  | 1 (1%) |
| General disorders | | | | | |
|  | Any grade ≥2 | 59 (15%) | 34 (15%) | >0.05 | 25 (16%) |
|  | Grade 2 | 46 (12%) | 27 (12%) |  | 19 (12%) |
|  | Grade 3 | 19 (5%) | 12 (5%) |  | 7 (5%) |
|  | Grade 4 | 0 (0%) | 0 (0%) |  | 0 (0%) |
| Nervous system disorders | | | | | |
| Peripheral neuropathy | Any grade ≥2 | 93 (24%) | 55 (24%) | >0.05 | 38 (24%) |
|  | Grade 2 | 85 (22%) | 51 (22%) |  | 34 (22%) |
|  | Grade 3 | 9 (2%) | 4 (2%) |  | 4 (3%) |
|  | Grade 4 | 0 (0%) | 0 (0%) |  | 0 (0%) |
| Other | Any grade ≥2 | 28 (7%) | 15 (7%) | >0.05 | 13 (8%) |
|  | Grade 2 | 14 (4%) | 8 (3%) |  | 6 (4%) |
|  | Grade 3 | 14 (4%) | 7 (3%) |  | 7 (5%) |
|  | Grade 4 | 0 (0%) | 0 (0%) |  | 0 (0%) |
| Skin and subcutaneous tissue disorder | | | | | |
|  | Any grade ≥2 | 51 (13%) | 29 (13%) | >0.05 | 22 (14%) |
|  | Grade 2 | 48 (13%) | 26 (11%) |  | 22 (14%) |
|  | Grade 3 | 5 (1%) | 4 (2%) |  | 1 (1%) |
|  | Grade 4 | 0 (0%) | 0 (0%) |  | 0 (0%) |
| Cardiac disorder | | | | | |
|  | Any grade ≥2 | 30 (8%) | 11 (5%) | **<0.05** | 19 (12%) |
|  | Grade 2 | 15 (4%) | 4 (2%) |  | 11 (7%) |
|  | Grade 3 | 16 (4%) | 8 (3%) |  | 8 (5%) |
|  | Grade 4 | 1 (0.3%) | 1 (0.4%) |  | 0 (0%) |
|  | Grade 5** | 1 (0.3%) | 1 (0.4%) |  | 0 (0%) |
| Respiratory, thoracic and mediastinal disorders | | | | | |
|  | Any grade ≥2 | 23 (6%) | 19 (8%) | >0.05 | 13 (8%) |
|  | Grade 2 | 16 (4%) | 6 (3%) |  | 10 (7%) |
|  | Grade 3 | 6 (2%) | 2 (1%) |  | 4 (3%) |
|  | Grade 4 | 3 (1%) | 2 (1%) |  | 1 (1%) |
|  | Grade 5*** | 2 (1%) | 0 (0%) |  | 2 (1%) |

Data are number of patients (%). Adverse events that occurred at grade ≥2 in ≥10% of patients and all grade 5 events are shown. Numbers include some patients who had multiple episodes of different grades. P-values compare age <65 years vs. ≥65 years: Chi-square/Fisher’s exact test (categorical). Bold p-values indicate statistically significant differences.

*Causes of death were infections (n=5). **Cause of death was cardiac arrest (n=1). ***Causes of death were interstitial lung disease (n=1) and respiratory failure due to flail chest caused by myeloma (n=1)
