# Supplementary material
Source: Research Square preprint supplement (doi:10.21203/rs.3.rs-9246435/v1)
Supplement: Supplementary file 3 [file 671364eec0ca38976f59c412.docx]

**Table 2:** Best overall response by investigator assessment

|  | **All patients**  **(n=382)** | **Patients <65 years**  **(n=229)** | **P-value** | **Patients ≥65 years**  **(n=153)** |
| --- | --- | --- | --- | --- |
| Overall response | 359 (94%) | 212 (93%) | >0.05 | 147 (96%) |
| Best overall response |  |  | >0.05 |  |
| MRD-negative complete response* (primary endpoint) | 127 (33%) | 73 (32%) |  | 54 (35%) |
| MRD-negative status | 176 (46%) | 108 (47%) |  | 68 (44%) |
| Stringent complete response | 27 (7%) | 13 (6%) |  | 14 (9%) |
| Complete response | 11 (3%) | 4 (2%) |  | 7 (5%) |
| Complete response or better | 165 (43%) | 90 (39%) |  | 75 (49%) |
| Very good partial response | 162 (42%) | 102 (45%) |  | 60 (39%) |
| Very good partial response or better | 327 (86%) | 192 (84%) |  | 135 (88%) |
| Partial response | 32 (8%) | 20 (9%) |  | 12 (8%) |
| Stable disease | 17 (4%) | 13 (6%) |  | 4 (3%) |
| Progressive disease | 2 (1%) | 2 (1%) |  | 0 (0%) |
| Not evaluable | 4 (1%) | 2 (1%) |  | 2 (1%) |

Data are n (%). P-values compare age <65 years vs. ≥65 years: Chi-square/Fisher’s exact test (categorical). *<1.0 x 10-5

MRD=measurable residual disease.
